# Supplementary material
Source: HighWire-hosted journal article supplement (https://bmjmedicine.bmj.com/highwire/filestream/718/field_highwire_adjunct_files/0/bmjmed-2022-000207supp001_data_supplement.pdf)
Supplement: bmjmed-2022-000207supp001_data_supplement.pdf [file bmjmed-2022-000207supp001_data_supplement.pdf]

## Supplemental Material

### Contents

|                                                                                                                                                                                                                                  |    |
|----------------------------------------------------------------------------------------------------------------------------------------------------------------------------------------------------------------------------------|----|
| <b>eTable 1.</b> Mortality and length of stay for acute ischemic stroke (AIS) patients in the COVID-19 (March 2020-February 2021) versus pre-COVID-19 study period (March 2019-February 2020).....                               | 5  |
| <b>eTable 2.</b> Mortality and length of stay for acute myocardial infarction (AMI) patients the first wave of COVID-19 (March 2020-February 2021) versus pre-COVID-19 study period (March 2019-February 2020).....              | 5  |
| <b>eTable 3.</b> Patient and provider characteristics for acute ischemic stroke (AIS) patients in the first wave of COVID-19 (March-May 2020) versus pre-COVID-19 study period (March-May 2019).....                             | 6  |
| <b>eTable 4.</b> Mortality and length of stay for acute ischemic stroke (AIS) patients in the first wave of COVID-19 (March-May 2020) versus pre-COVID-19 study period (March-May 2019).....                                     | 8  |
| <b>eTable 5.</b> Patient and provider characteristics for acute ischemic stroke (AIS) patients in the second wave of COVID-19 (June-August 2020) versus pre-COVID-19 study period (June-August 2019).....                        | 9  |
| <b>eTable 6.</b> Mortality and length of stay for acute ischemic stroke (AIS) patients in the second wave of COVID-19 (June-August 2020) versus pre-COVID-19 study period (June-August 2019).....                                | 11 |
| <b>eTable 7.</b> Patient and provider characteristics for acute ischemic stroke (AIS) patients in the third wave of COVID-19 (September 2020-February 2021) versus pre-COVID-19 study period (September 2019-February 2020)..... | 12 |
| <b>eTable 8.</b> Mortality and length of stay for acute ischemic stroke (AIS) patients in the third wave of COVID-19 (September 2020-February 2021) versus pre-COVID-19 study period (September 2019-February 2020).....         | 14 |
| <b>eTable 9.</b> Patient and provider characteristics for acute myocardial infarction (AMI) patients in the first wave of COVID-19 (March-May 2020) versus pre-COVID-19 study period (March-May 2019).....                       | 15 |
| <b>eTable 10.</b> Mortality and length of stay for acute myocardial infarction (AMI) patients the first wave of COVID-19 (March-May 2020) versus pre-COVID-19 study period (March-May 2019).....                                 | 16 |

|                                                                                                                                                                                                                                         |    |
|-----------------------------------------------------------------------------------------------------------------------------------------------------------------------------------------------------------------------------------------|----|
| <b>eTable 11.</b> Patient and provider characteristics for acute myocardial infarction (AMI) patients in the second wave of COVID-19 (June-August 2020) versus pre-COVID-19 study period (June-August 2019).....                        | 18 |
| <b>eTable 12.</b> Mortality and length of stay for acute myocardial infarction (AMI) patients in the second wave of COVID-19 (June-August 2020) versus pre-COVID-19 study period (June-August 2019).....                                | 20 |
| <b>eTable 13.</b> Patient and provider characteristics for acute myocardial infarction (AMI) patients in the third wave of COVID-19 (September 2020-February 2021) versus pre-COVID-19 study period (September 2019-February 2020)..... | 21 |
| <b>eTable 14.</b> Mortality and length of stay for acute myocardial infarction (AMI) patients in the third wave of COVID-19 (September 2020-February 2021) versus pre-COVID-19 study period (September 2019- February 2020).....        | 22 |
| <b>eFigure 1.</b> Flow diagram of hospitals contributing inpatient data continuously from March 2019 to February 2021.....                                                                                                              | 25 |
| <b>eTable 15.</b> Characteristics of hospitals contributing inpatient data continuously from March 2019 to February 2021.....                                                                                                           | 26 |
| <b>eFigure 2.</b> Volume of intravenous thrombolysis (IVT), mechanical thrombectomy (MT), percutaneous coronary intervention (PCI), and PCI with AMI shown as number of admissions per month from March 2019 – December 2021.....       | 27 |
| <b>eFigure 3.</b> Volume of intravenous thrombolysis (IVT), mechanical thrombectomy (MT), percutaneous coronary intervention (PCI), and PCI with AMI shown as number of admissions per month from March 2019 – December 2021.....       | 28 |

**eTable 1. Mortality and length of stay for acute ischemic stroke (AIS) patients in the COVID-19 (March 2020 – February 2021) versus pre-COVID-19 study period (March 2019 – February 2020)**

|                                                                     | <b>Bivariate Comparison (COVID-19 versus pre-COVID-19)</b> | <b>Generalized estimating equation (GEE) Ratio of the Means<sup>a</sup></b> | <b>95% Confidence Interval (CI)</b> | <b>P-value<sup>c</sup></b> |
|---------------------------------------------------------------------|------------------------------------------------------------|-----------------------------------------------------------------------------|-------------------------------------|----------------------------|
| <b>Mortality (% of admissions)</b>                                  | 3.51% vs. 3.16%                                            | 1.09                                                                        | 1.03 – 1.15                         | 0.0013                     |
| <b>Adjusted LOS<sup>b</sup> (mean [standard error of the mean])</b> | 4.27 (0.04) vs. 4.24 (0.04)                                | 1.01                                                                        | 0.99 – 1.03                         | 0.3121                     |

<sup>a</sup> Generalized estimating equation model adjusted for study covariates; <sup>b</sup> LOS Length of stay; <sup>c</sup> P-value derived from GEE model

**eTable 2. Mortality and length of stay for acute myocardial infarction (AMI) patients the first wave of COVID-19 (March 2020 – February 2021) versus pre-COVID-19 study period (March 2019 – February 2020)**

|                                                                     | <b>Bivariate Comparison (COVID-19 versus pre-COVID-19)</b> | <b>Generalized estimating equation (GEE) Ratio of the Means<sup>a</sup></b> | <b>95% Confidence Interval (CI)</b> | <b>P-value<sup>c</sup></b> |
|---------------------------------------------------------------------|------------------------------------------------------------|-----------------------------------------------------------------------------|-------------------------------------|----------------------------|
| <b>Mortality (% of admissions)</b>                                  | 4.81% vs. 4.29%                                            | 1.18                                                                        | 1.13 – 1.23                         | <0.0001                    |
| <b>Adjusted LOS<sup>b</sup> (mean [standard error of the mean])</b> | 3.81 (0.04) vs. 3.96 (0.04)                                | 0.96                                                                        | 0.95 – 0.97                         | <0.0001                    |

<sup>a</sup> Generalized estimating equation model adjusted for study covariates; <sup>b</sup> LOS Length of stay; <sup>c</sup> P-value derived from GEE model

**eTable 3. Patient and provider characteristics for acute ischemic stroke (AIS) patients in the first wave of COVID-19 (March-May 2020) versus pre-COVID-19 study period (March-May 2019)**

|                            | COVID-19 Era<br>(March – May 2020)<br>(N = 24,355) |          | Pre-COVID-19 Era<br>(March – May 2019)<br>(N = 32,409) |          | P-values       |
|----------------------------|----------------------------------------------------|----------|--------------------------------------------------------|----------|----------------|
| AIS Hospitalization Volume | 24,355                                             |          | 32,409                                                 |          | 24.85% decline |
| <b>Characteristics</b>     | <b>N</b>                                           | <b>%</b> | <b>N</b>                                               | <b>%</b> |                |
| <b>Age (years)</b>         |                                                    |          |                                                        |          |                |
| Median IQR                 | 71.00                                              | 19.00    | 71.00                                                  | 19.00    | 0.0002         |
| Mean +/- SD                | 70.02                                              | 13.23    | 70.50                                                  | 12.98    | 0.0016         |
| 18 – 49                    | 1,753                                              | 7.20%    | 2,107                                                  | 6.50%    | 0.0010         |
| 50 – 59                    | 3,351                                              | 13.76%   | 4,311                                                  | 13.30%   |                |
| 60 – 69                    | 5,907                                              | 24.25%   | 7,812                                                  | 24.10%   |                |
| 70+                        | 13,344                                             | 54.79%   | 18,179                                                 | 56.09%   |                |
| <b>Gender</b>              |                                                    |          |                                                        |          | 0.4230         |
| Male                       | 12,710                                             | 52.19%   | 16,803                                                 | 51.85%   |                |
| Female                     | 11,645                                             | 47.81%   | 15,606                                                 | 48.15%   |                |
| <b>Race</b>                |                                                    |          |                                                        |          | <0.0001        |
| White                      | 18,513                                             | 76.01%   | 24,823                                                 | 76.59%   |                |
| Black                      | 3,823                                              | 15.70%   | 4,719                                                  | 14.56%   |                |
| Asian                      | 434                                                | 1.78%    | 622                                                    | 1.92%    |                |
| Other                      | 1,585                                              | 6.51%    | 2,245                                                  | 6.93%    |                |
| <b>Marital Status</b>      |                                                    |          |                                                        |          | <0.0001        |
| Married                    | 10,145                                             | 41.65%   | 13,934                                                 | 42.99%   |                |

|                                 |        |        |        |        |         |
|---------------------------------|--------|--------|--------|--------|---------|
| Single                          | 12,063 | 49.53% | 15,508 | 47.85% |         |
| Other                           | 2,147  | 8.82%  | 2,967  | 9.15%  |         |
| <b>Payor</b>                    |        |        |        |        | <0.0001 |
| Commercial                      | 3,946  | 16.20% | 4,994  | 15.41% |         |
| Medicaid                        | 2,193  | 9.00%  | 2,661  | 8.21%  |         |
| Medicare                        | 16,629 | 68.28% | 22,890 | 70.63% |         |
| Other                           | 1,587  | 6.52%  | 1,864  | 5.75%  |         |
| <b>Elixhauser Score</b>         |        |        |        |        | <0.0001 |
| 0                               | 345    | 1.42%  | 579    | 1.79%  |         |
| 1                               | 1,424  | 5.85%  | 2,437  | 7.52%  |         |
| 2+                              | 22,586 | 92.74% | 29,393 | 90.69% |         |
| <b>Congestive Heart Failure</b> |        |        |        |        | 0.0130  |
|                                 | 4,851  | 19.92% | 6,186  | 19.09% |         |
| <b>Hypertension</b>             |        |        |        |        | 0.0160  |
|                                 | 21,131 | 86.76% | 27,891 | 86.06% |         |
| <b>Diabetes</b>                 |        |        |        |        | 0.5460  |
|                                 | 9,680  | 39.75% | 12,800 | 39.50% |         |
| <b>Obesity</b>                  |        |        |        |        | 0.0001  |
|                                 | 4,154  | 17.06% | 4,958  | 15.30% |         |
| <b>Atrial Fibrillation</b>      |        |        |        |        | 0.0020  |
|                                 | 6,011  | 24.68% | 7,627  | 23.53% |         |
| <b>TIA</b>                      |        |        |        |        | 0.0120  |
|                                 | 436    | 1.79%  | 493    | 1.52%  |         |
| <b>Coronary Artery Disease</b>  |        |        |        |        | 0.0001  |
|                                 | 7,298  | 29.97% | 10,192 | 31.45% |         |
| <b>Dyslipidemia</b>             |        |        |        |        | 0.0180  |
|                                 | 16,091 | 66.07% | 21,102 | 65.11% |         |
| <b>Smoking</b>                  |        |        |        |        | 0.2960  |
|                                 | 5,190  | 21.31% | 6,789  | 20.95% |         |
| <b>Number of Beds</b>           |        |        |        |        | 0.2150  |
| 0 – 299                         | 7,783  | 31.96% | 10,189 | 31.44% |         |
| 300 – 500                       | 7,526  | 30.90% | 10,223 | 31.54% |         |
| 500+                            | 9,046  | 37.14% | 11,997 | 37.02% |         |
| <b>Region</b>                   |        |        |        |        | <0.0001 |
| Midwest                         | 5,719  | 23.48% | 7,480  | 23.08% |         |
| Northeast                       | 2,828  | 11.61% | 4,288  | 13.23% |         |
| South                           | 12,276 | 50.40% | 16,203 | 50.00% |         |
| West                            | 3,532  | 14.50% | 4,438  | 13.69% |         |
| <b>Urban-Rural Status</b>       |        |        |        |        | 0.7290  |
| Rural                           | 2,978  | 12.23% | 3,994  | 12.32% |         |
| Urban                           | 21,377 | 87.77% | 28,415 | 87.68% |         |
| <b>Teaching</b>                 |        |        |        |        | 0.4480  |
|                                 | 12,367 | 50.78% | 16,561 | 51.10% |         |

|                                       |       |        |       |       |         |
|---------------------------------------|-------|--------|-------|-------|---------|
| <b>Mechanical Thrombectomy (MT)</b>   | 1,879 | 7.72%  | 1,909 | 5.89% | <0.0001 |
| <b>Intravenous Thrombolysis (IVT)</b> | 2,558 | 10.49% | 3,004 | 9.27% | <0.0001 |

**eTable 4. Mortality and length of stay for acute ischemic stroke (AIS) patients in the first wave of COVID-19 (March-May 2020) versus pre-COVID-19 study period (March-May 2019)**

|                                                                     | <b>Bivariate Comparison (COVID-19 versus pre-COVID-19)</b> | <b>Generalized estimating equation (GEE) Ratio of the Means<sup>a</sup></b> | <b>95% Confidence Interval (CI)</b> | <b>P-value<sup>c</sup></b> |
|---------------------------------------------------------------------|------------------------------------------------------------|-----------------------------------------------------------------------------|-------------------------------------|----------------------------|
| <b>Mortality (% of admissions)</b>                                  | 3.51% vs. 3.07%                                            | 1.10                                                                        | 0.99 – 1.22                         | 0.0789                     |
| <b>Adjusted LOS<sup>b</sup> (mean [standard error of the mean])</b> | 4.10 (0.05) vs. 4.22 (0.05)                                | 0.97                                                                        | 0.95 – 0.99                         | 0.0151                     |

<sup>a</sup>Generalized estimating equation model adjusted for study covariates; <sup>b</sup>LOS Length of stay; <sup>c</sup>P-value derived from GEE model

**eTable 5. Patient and provider characteristics for acute ischemic stroke (AIS) patients in the second wave of COVID-19 (June-August 2020) versus pre-COVID-19 study period (June-August 2019)**

|                            | <b>COVID-19 Era<br/>(June – August 2020)<br/>(N = 27,925)</b> |          | <b>Pre-COVID-19 Era<br/>(June – August 2019)<br/>(N = 31,497)</b> |          | <b>P-values</b> |
|----------------------------|---------------------------------------------------------------|----------|-------------------------------------------------------------------|----------|-----------------|
| AIS Hospitalization Volume | 27,925                                                        |          | 31,497                                                            |          | 11.34% decline  |
| <b>Characteristics</b>     | <b>N</b>                                                      | <b>%</b> | <b>N</b>                                                          | <b>%</b> |                 |
| <b>Age (years)</b>         |                                                               |          |                                                                   |          |                 |
| Median IQR                 | 71.00                                                         | 18.00    | 71.00                                                             | 18.00    | 0.0348          |
| Mean +/- SD                | 69.88                                                         | 13.07    | 70.12                                                             | 13.12    | 0.5167          |
| 18 – 49                    | 2,058                                                         | 7.37%    | 2,203                                                             | 6.99%    | 0.3280          |
| 50 – 59                    | 3,752                                                         | 13.44%   | 4,296                                                             | 13.64%   |                 |
| 60 – 69                    | 6,839                                                         | 24.49%   | 7,713                                                             | 24.49%   |                 |
| 70+                        | 15,276                                                        | 54.70%   | 17,285                                                            | 54.88%   |                 |
| <b>Gender</b>              |                                                               |          |                                                                   |          | 0.8220          |
| Male                       | 14,596                                                        | 52.27%   | 16,434                                                            | 52.18%   |                 |
| Female                     | 13,329                                                        | 47.73%   | 15,063                                                            | 47.82%   |                 |
| <b>Race</b>                |                                                               |          |                                                                   |          | <0.0001         |
| White                      | 21,585                                                        | 77.30%   | 23,905                                                            | 75.90%   |                 |
| Black                      | 4,122                                                         | 14.76%   | 4,731                                                             | 15.02%   |                 |
| Asian                      | 513                                                           | 1.84%    | 661                                                               | 2.10%    |                 |
| Other                      | 1,705                                                         | 6.11%    | 2,200                                                             | 6.98%    |                 |
| <b>Marital Status</b>      |                                                               |          |                                                                   |          | 0.5410          |
| Married                    | 12,028                                                        | 43.07%   | 13,486                                                            | 42.82%   |                 |
| Single                     | 13,577                                                        | 48.62%   | 15,319                                                            | 48.64%   |                 |
| Other                      | 2,320                                                         | 8.31%    | 2,692                                                             | 8.55%    |                 |
| <b>Payor</b>               |                                                               |          |                                                                   |          | 0.0020          |
| Commercial                 | 4,560                                                         | 16.33%   | 4,917                                                             | 15.61%   |                 |
| Medicaid                   | 2,563                                                         | 9.18%    | 2,712                                                             | 8.61%    |                 |
| Medicare                   | 18,998                                                        | 68.03%   | 21,859                                                            | 69.40%   |                 |
| Other                      | 1,804                                                         | 6.46%    | 2,009                                                             | 6.38%    |                 |
| <b>Elixhauser Score</b>    |                                                               |          |                                                                   |          | <0.0001         |
| 0                          | 369                                                           | 1.32%    | 551                                                               | 1.75%    |                 |



|                                       |        |        |        |        |         |
|---------------------------------------|--------|--------|--------|--------|---------|
| 1                                     | 1,815  | 6.50%  | 2,293  | 7.28%  |         |
| 2+                                    | 25,741 | 92.18% | 28,653 | 90.97% |         |
| <b>Congestive Heart Failure</b>       | 5,557  | 19.90% | 5,973  | 18.96% | 0.0040  |
| <b>Hypertension</b>                   | 24,332 | 87.13% | 27,206 | 86.38% | 0.0070  |
| <b>Diabetes</b>                       | 11,045 | 39.55% | 12,379 | 39.30% | 0.5330  |
| <b>Obesity</b>                        | 4,996  | 17.89% | 5,087  | 16.15% | 0.0001  |
| <b>Atrial Fibrillation</b>            | 6,602  | 23.64% | 7,226  | 22.94% | 0.0440  |
| <b>TIA</b>                            | 487    | 1.74%  | 491    | 1.56%  | 0.0770  |
| <b>Coronary Artery Disease</b>        | 8,652  | 30.98% | 9,829  | 31.21% | 0.5580  |
| <b>Dyslipidemia</b>                   | 18,810 | 67.36% | 20,906 | 66.37% | 0.0110  |
| <b>Smoking</b>                        | 6,118  | 21.91% | 6,814  | 21.63% | 0.4180  |
| <b>Number of Beds</b>                 |        |        |        |        | 0.4300  |
| 0 – 299                               | 8,946  | 32.04% | 9,938  | 31.55% |         |
| 300 – 500                             | 8,533  | 30.56% | 9,725  | 30.88% |         |
| 500+                                  | 10,446 | 37.41% | 11,834 | 37.57% |         |
| <b>Region</b>                         |        |        |        |        | 0.0350  |
| Midwest                               | 6,942  | 24.86% | 7,589  | 24.09% |         |
| Northeast                             | 3,530  | 12.64% | 4,175  | 13.26% |         |
| South                                 | 13,693 | 49.03% | 15,551 | 49.37% |         |
| West                                  | 3,760  | 13.46% | 4,182  | 13.28% |         |
| <b>Urban-Rural Status</b>             |        |        |        |        | 0.6830  |
| Rural                                 | 3,421  | 12.25% | 3,824  | 12.14% |         |
| Urban                                 | 24,504 | 87.75% | 27,673 | 87.86% |         |
| <b>Teaching</b>                       | 14,437 | 51.70% | 16,459 | 52.26% | 0.1750  |
| <b>Mechanical Thrombectomy (MT)</b>   | 2,125  | 7.61%  | 1,887  | 5.99%  | <0.0001 |
| <b>Intravenous Thrombolysis (IVT)</b> | 2,846  | 10.19% | 3,063  | 9.72%  | 0.0577  |

**eTable 6. Mortality and length of stay for acute ischemic stroke (AIS) patients in the second wave of COVID-19 (June-August 2020) versus pre-COVID-19 study period (June-August 2019)**

|                                                                     | <b>Bivariate Comparison (COVID-19 versus pre-COVID-19)</b> | <b>Generalized estimating equation (GEE) Ratio of the Means<sup>a</sup></b> | <b>95% Confidence Interval (CI)</b> | <b>P-value<sup>c</sup></b> |
|---------------------------------------------------------------------|------------------------------------------------------------|-----------------------------------------------------------------------------|-------------------------------------|----------------------------|
| <b>Mortality (% of admissions)</b>                                  | 3.43% vs. 2.84%                                            | 1.16                                                                        | 1.06 – 1.27                         | 0.0010                     |
| <b>Adjusted LOS<sup>b</sup> (mean [standard error of the mean])</b> | 4.28 (0.05) vs. 4.17 (0.05)                                | 1.02                                                                        | 0.99 – 1.05                         | 0.0581                     |

<sup>a</sup>Generalized estimating equation model adjusted for study covariates; <sup>b</sup>LOS Length of stay; <sup>c</sup>P-value derived from GEE model

**eTable 7. Patient and provider characteristics for acute ischemic stroke (AIS) patients in the third wave of COVID-19 (September 2020 – February 2021) versus pre-COVID-19 study period (September 2019 – February 2020)**

|                            | COVID-19 Era<br>(September 2020 – February 2021)<br>(N = 52,801) |          | Pre-COVID-19 Era<br>(September 2019 – February 2020)<br>(N = 61,210) |          | P-values       |
|----------------------------|------------------------------------------------------------------|----------|----------------------------------------------------------------------|----------|----------------|
| AIS Hospitalization Volume | 52,801                                                           |          | 61,210                                                               |          | 13.74% decline |
| <b>Characteristics</b>     | <b>N</b>                                                         | <b>%</b> | <b>N</b>                                                             | <b>%</b> |                |
| <b>Age (years)</b>         |                                                                  |          |                                                                      |          |                |
| Median IQR                 | 72.00                                                            | 18.00    | 72.00                                                                | 19.00    | 0.0022         |
| Mean +/- SD                | 70.33                                                            | 13.08    | 70.54                                                                | 13.14    | 0.0064         |
| 18 – 49                    | 3,740                                                            | 7.08%    | 4,179                                                                | 6.83%    | 0.0040         |
| 50 – 59                    | 6,651                                                            | 12.60%   | 7,929                                                                | 12.95%   |                |
| 60 – 69                    | 12,868                                                           | 24.37%   | 14,488                                                               | 23.67%   |                |
| 70+                        | 29,542                                                           | 55.95%   | 34,614                                                               | 56.55%   |                |
| <b>Gender</b>              |                                                                  |          |                                                                      |          | 0.2130         |
| Male                       | 27,252                                                           | 51.61%   | 31,366                                                               | 51.24%   |                |
| Female                     | 25,549                                                           | 48.39%   | 29,844                                                               | 48.76%   |                |
| <b>Race</b>                |                                                                  |          |                                                                      |          | <0.0001        |
| White                      | 40,327                                                           | 76.38%   | 46,519                                                               | 76.00%   |                |
| Black                      | 8,236                                                            | 15.60%   | 9,276                                                                | 15.15%   |                |
| Asian                      | 1,053                                                            | 1.99%    | 1,202                                                                | 1.96%    |                |
| Other                      | 3,185                                                            | 6.03%    | 4,213                                                                | 6.88%    |                |
| <b>Marital Status</b>      |                                                                  |          |                                                                      |          | 0.2060         |
| Married                    | 22,365                                                           | 42.36%   | 26,246                                                               | 42.88%   |                |
| Single                     | 25,815                                                           | 48.89%   | 29,665                                                               | 48.46%   |                |
| Other                      | 4,621                                                            | 8.75%    | 5,299                                                                | 8.66%    |                |
| <b>Payor</b>               |                                                                  |          |                                                                      |          | 0.0040         |
| Commercial                 | 8,385                                                            | 15.88%   | 9,800                                                                | 16.01%   |                |
| Medicaid                   | 4,556                                                            | 8.63%    | 5,059                                                                | 8.26%    |                |
| Medicare                   | 36,411                                                           | 68.96%   | 42,594                                                               | 69.59%   |                |
| Other                      | 3,449                                                            | 6.53%    | 3,757                                                                | 6.14%    |                |
| <b>Elixhauser Score</b>    |                                                                  |          |                                                                      |          | 0.0010         |

|                                       |        |        |        |        |         |
|---------------------------------------|--------|--------|--------|--------|---------|
| 0                                     | 765    | 1.45%  | 1,016  | 1.66%  |         |
| 1                                     | 3,428  | 6.49%  | 4,166  | 6.81%  |         |
| 2+                                    | 48,608 | 92.06% | 56,028 | 91.53% |         |
| <b>Congestive Heart Failure</b>       | 10,197 | 19.31% | 12,017 | 19.63% | 0.1730  |
| <b>Hypertension</b>                   | 45,941 | 87.01% | 53,026 | 86.63% | 0.0600  |
| <b>Diabetes</b>                       | 20,748 | 39.29% | 23,878 | 39.01% | 0.3260  |
| <b>Obesity</b>                        | 9,453  | 17.90% | 9,990  | 16.32% | 0.0001  |
| <b>Atrial Fibrillation</b>            | 12,894 | 24.42% | 15,106 | 24.68% | 0.3110  |
| <b>TIA</b>                            | 984    | 1.86%  | 1,020  | 1.67%  | 0.0120  |
| <b>Coronary Artery Disease</b>        | 16,060 | 30.42% | 18,741 | 30.62% | 0.4610  |
| <b>Dyslipidemia</b>                   | 35,644 | 67.51% | 40,665 | 66.44% | 0.0001  |
| <b>Smoking</b>                        | 10,789 | 20.43% | 12,530 | 20.47% | 0.8770  |
| <b>Number of Beds</b>                 |        |        |        |        | 0.0060  |
| 0 – 299                               | 17,164 | 32.51% | 19,395 | 31.69% |         |
| 300 – 500                             | 15,817 | 29.96% | 18,748 | 30.63% |         |
| 500+                                  | 19,820 | 37.54% | 23,067 | 37.69% |         |
| <b>Region</b>                         |        |        |        |        | 0.0001  |
| Midwest                               | 12,846 | 24.33% | 14,303 | 23.37% |         |
| Northeast                             | 6,809  | 12.90% | 8,004  | 13.08% |         |
| South                                 | 25,968 | 49.18% | 30,260 | 49.44% |         |
| West                                  | 7,178  | 13.59% | 8,643  | 14.12% |         |
| <b>Urban-Rural Status</b>             |        |        |        |        | 0.0270  |
| Rural                                 | 6,127  | 11.60% | 7,362  | 12.03% |         |
| Urban                                 | 46,674 | 88.40% | 53,848 | 87.97% |         |
| <b>Teaching</b>                       |        |        |        |        |         |
| <b>Mechanical Thrombectomy (MT)</b>   | 3,975  | 7.53%  | 4,120  | 6.73%  | <0.0001 |
| <b>Intravenous Thrombolysis (IVT)</b> | 5,206  | 9.86%  | 6,126  | 10.01% | 0.4033  |

**eTable 8. Mortality and length of stay for acute ischemic stroke (AIS) patients in the third wave of COVID-19 (September 2020 – February 2021) versus pre-COVID-19 study period (September 2019 – February 2020)**

|                                                                     | <b>Bivariate Comparison (COVID-19 versus pre-COVID-19)</b> | <b>Generalized estimating equation (GEE) Ratio of the Means<sup>a</sup></b> | <b>95% Confidence Interval (CI)</b> | <b>P-value<sup>c</sup></b> |
|---------------------------------------------------------------------|------------------------------------------------------------|-----------------------------------------------------------------------------|-------------------------------------|----------------------------|
| <b>Mortality (% of admissions)</b>                                  | 3.56% vs. 3.37%                                            | 1.06                                                                        | 0.99 – 1.13                         | 0.1107                     |
| <b>Adjusted LOS<sup>b</sup> (mean [standard error of the mean])</b> | 4.36 (0.04) vs. 4.30 (0.04)                                | 1.01                                                                        | 1.00 – 1.03                         | 0.1072                     |

<sup>a</sup>Generalized estimating equation model adjusted for study covariates; <sup>b</sup>LOS Length of stay; <sup>c</sup>P-value derived from GEE model

**eTable 9. Patient and provider characteristics for acute myocardial infarction (AMI) patients in the first wave of COVID-19 (March-May 2020) versus pre-COVID-19 study period (March-May 2019)**

|                            | COVID-19 Era<br>(March – May 2020)<br>(N = 26,340) |          | Pre-COVID-19 Era<br>(March – May 2019)<br>(N = 35,993) |          | P-values       |
|----------------------------|----------------------------------------------------|----------|--------------------------------------------------------|----------|----------------|
| AMI Hospitalization Volume | 26,340                                             |          | 35,993                                                 |          | 26.81% decline |
| <b>Characteristics</b>     | <b>N</b>                                           | <b>%</b> | <b>N</b>                                               | <b>%</b> |                |
| <b>Age (years)</b>         |                                                    |          |                                                        |          |                |
| Median IQR                 | 66.00                                              | 18.00    | 67.00                                                  | 19.00    | <0.0001        |
| Mean +/- SD                | 65.79                                              | 12.96    | 66.71                                                  | 13.15    | 0.0116         |
| 18 – 49                    | 2,974                                              | 11.29%   | 3,812                                                  | 10.59%   | <0.0001        |
| 50 – 59                    | 5,245                                              | 19.91%   | 6,911                                                  | 19.20%   |                |
| 60 – 69                    | 7,579                                              | 28.77%   | 9,603                                                  | 26.68%   |                |
| 70+                        | 10,542                                             | 40.02%   | 15,667                                                 | 43.53%   |                |
| <b>Gender</b>              |                                                    |          |                                                        |          | <0.0001        |
| Male                       | 17,212                                             | 65.35%   | 22,746                                                 | 63.20%   |                |
| Female                     | 9,128                                              | 34.65%   | 13,247                                                 | 36.80%   |                |
| <b>Race</b>                |                                                    |          |                                                        |          | <0.0001        |
| White                      | 21,301                                             | 80.87%   | 28,449                                                 | 79.04%   |                |
| Black                      | 2,707                                              | 10.28%   | 3,942                                                  | 10.95%   |                |
| Asian                      | 483                                                | 1.83%    | 767                                                    | 2.13%    |                |
| Other                      | 1,849                                              | 7.02%    | 2,835                                                  | 7.88%    |                |
| <b>Marital Status</b>      |                                                    |          |                                                        |          | <0.0001        |
| Married                    | 12,634                                             | 47.97%   | 17,088                                                 | 47.48%   |                |
| Single                     | 11,405                                             | 43.30%   | 15,293                                                 | 42.49%   |                |
| Other                      | 2,301                                              | 8.74%    | 3,612                                                  | 10.04%   |                |
| <b>Payor</b>               |                                                    |          |                                                        |          | <0.0001        |
| Commercial                 | 6,794                                              | 25.79%   | 8,392                                                  | 23.32%   |                |
| Medicaid                   | 2,575                                              | 9.78%    | 3,310                                                  | 9.20%    |                |
| Medicare                   | 14,541                                             | 55.21%   | 21,265                                                 | 59.08%   |                |
| Other                      | 2,430                                              | 9.23%    | 3,026                                                  | 8.41%    |                |
| <b>Elixhauser Score</b>    |                                                    |          |                                                        |          | 0.0540         |
| 0                          | 827                                                | 3.14%    | 1,245                                                  | 3.46%    |                |

|                                                 |        |        |        |        |         |
|-------------------------------------------------|--------|--------|--------|--------|---------|
| 1                                               | 2,843  | 10.79% | 3,964  | 11.01% |         |
| 2+                                              | 22,670 | 86.07% | 30,784 | 85.53% |         |
| <b>Congestive Heart Failure</b>                 | 11,306 | 42.92% | 15,462 | 42.96% | 0.9300  |
| <b>Hypertension</b>                             | 21,849 | 82.95% | 29,906 | 83.09% | 0.6490  |
| <b>Diabetes</b>                                 | 10,720 | 40.70% | 15,025 | 41.74% | 0.0090  |
| <b>Obesity</b>                                  | 6,649  | 25.24% | 8,209  | 22.81% | 0.0001  |
| <b>Atrial Fibrillation</b>                      | 4,047  | 15.36% | 6,058  | 16.83% | 0.0001  |
| <b>TIA</b>                                      | 56     | 0.21%  | 82     | 0.23%  | 0.6900  |
| <b>Coronary Artery Disease</b>                  | 22,426 | 85.14% | 30,599 | 85.01% | 0.6610  |
| <b>Dyslipidemia</b>                             | 19,429 | 73.76% | 26,062 | 72.41% | 0.0001  |
| <b>Smoking</b>                                  | 7,321  | 27.79% | 9,471  | 26.31% | 0.0001  |
| <b>Number of Beds</b>                           |        |        |        |        | <0.0001 |
| 0 – 299                                         | 9,132  | 34.67% | 11,959 | 33.23% |         |
| 300 – 500                                       | 8,584  | 32.59% | 12,114 | 33.66% |         |
| 500+                                            | 8,624  | 32.74% | 11,920 | 33.12% |         |
| <b>Region</b>                                   |        |        |        |        | <0.0001 |
| Midwest                                         | 6,456  | 24.51% | 9,074  | 25.21% |         |
| Northeast                                       | 3,082  | 11.70% | 4,627  | 12.86% |         |
| South                                           | 12,953 | 49.18% | 17,189 | 47.76% |         |
| West                                            | 3,849  | 14.61% | 5,103  | 14.18% |         |
| <b>Urban-Rural Status</b>                       |        |        |        |        | 0.9130  |
| Rural                                           | 3,484  | 13.23% | 4,750  | 13.20% |         |
| Urban                                           | 22,856 | 86.77% | 31,243 | 86.80% |         |
| <b>Teaching</b>                                 | 12,810 | 48.63% | 18,020 | 50.07% | 0.0001  |
| <b>Percutaneous Coronary Intervention (PCI)</b> | 16,948 | 64.34% | 21,681 | 60.24% | 0.0001  |

**eTable 10. Mortality and length of stay for acute myocardial infarction (AMI) patients the first wave of COVID-19 (March-May 2020) versus pre-COVID-19 study period (March-May 2019)**

|                                                                     | <b>Bivariate Comparison (COVID-19 versus pre-COVID-19)</b> | <b>Generalized estimating equation (GEE) Ratio of the Means<sup>a</sup></b> | <b>95% Confidence Interval (CI)</b> | <b>P-value<sup>c</sup></b> |
|---------------------------------------------------------------------|------------------------------------------------------------|-----------------------------------------------------------------------------|-------------------------------------|----------------------------|
| <b>Mortality (% of admissions)</b>                                  | 4.56% vs. 4.37%                                            | 1.13                                                                        | 1.04 – 1.23                         | 0.0043                     |
| <b>Adjusted LOS<sup>b</sup> (mean [standard error of the mean])</b> | 3.74 (0.04) vs. 4.02 (0.05)                                | 0.93                                                                        | 0.91 – 0.95                         | <0.0001                    |

<sup>a</sup>Generalized estimating equation model adjusted for study covariates; <sup>b</sup>LOS Length of stay; <sup>c</sup>P-value derived from GEE model



**eTable 11. Patient and provider characteristics for acute myocardial infarction (AMI) patients in the second wave of COVID-19 (June-August 2020) versus pre-COVID-19 study period (June-August 2019)**

|                            | COVID-19 Era<br>(June – August 2020)<br>(N = 29,372) |          | Pre-COVID-19 Era<br>(June – August 2019)<br>(N = 34,010) |          | P-values       |
|----------------------------|------------------------------------------------------|----------|----------------------------------------------------------|----------|----------------|
| AMI Hospitalization Volume | 29,372                                               |          | 34,010                                                   |          | 13.63% decline |
| <b>Characteristics</b>     | <b>N</b>                                             | <b>%</b> | <b>N</b>                                                 | <b>%</b> |                |
| <b>Age (years)</b>         |                                                      |          |                                                          |          |                |
| Median IQR                 | 66.00                                                | 19.00    | 67.00                                                    | 19.00    | <0.0001        |
| Mean +/- SD                | 65.89                                                | 13.10    | 66.34                                                    | 13.19    | 0.2542         |
| 18 – 49                    | 3,277                                                | 11.16%   | 3,729                                                    | 10.96%   | 0.0010         |
| 50 – 59                    | 6,101                                                | 20.77%   | 6,740                                                    | 19.82%   |                |
| 60 – 69                    | 8,026                                                | 27.33%   | 9,170                                                    | 26.96%   |                |
| 70+                        | 11,968                                               | 40.75%   | 14,371                                                   | 42.26%   |                |
| <b>Gender</b>              |                                                      |          |                                                          |          | 0.1470         |
| Male                       | 18,819                                               | 64.07%   | 21,602                                                   | 63.52%   |                |
| Female                     | 10,553                                               | 35.93%   | 12,408                                                   | 36.48%   |                |
| <b>Race</b>                |                                                      |          |                                                          |          | <0.0001        |
| White                      | 23,721                                               | 80.76%   | 27,030                                                   | 79.48%   |                |
| Black                      | 3,097                                                | 10.54%   | 3,599                                                    | 10.58%   |                |
| Asian                      | 611                                                  | 2.08%    | 729                                                      | 2.14%    |                |
| Other                      | 1,943                                                | 6.62%    | 2,652                                                    | 7.80%    |                |
| <b>Marital Status</b>      |                                                      |          |                                                          |          | 0.8300         |
| Married                    | 14,045                                               | 47.82%   | 16,287                                                   | 47.89%   |                |
| Single                     | 12,650                                               | 43.07%   | 14,584                                                   | 42.88%   |                |
| Other                      | 2,677                                                | 9.11%    | 3,139                                                    | 9.23%    |                |
| <b>Payor</b>               |                                                      |          |                                                          |          | <0.0001        |
| Commercial                 | 7,323                                                | 24.93%   | 8,139                                                    | 23.93%   |                |
| Medicaid                   | 2,989                                                | 10.18%   | 3,206                                                    | 9.43%    |                |
| Medicare                   | 16,448                                               | 56.00%   | 19,477                                                   | 57.27%   |                |
| Other                      | 2,612                                                | 8.89%    | 3,188                                                    | 9.37%    |                |
| <b>Elixhauser Score</b>    |                                                      |          |                                                          |          | 0.0010         |
| 0                          | 987                                                  | 3.36%    | 1,181                                                    | 3.47%    |                |

|                                                 |        |        |        |        |        |
|-------------------------------------------------|--------|--------|--------|--------|--------|
| 1                                               | 3,132  | 10.66% | 3,923  | 11.53% |        |
| 2+                                              | 25,253 | 85.98% | 28,906 | 84.99% |        |
| <b>Congestive Heart Failure</b>                 | 12,373 | 42.13% | 14,238 | 41.86% | 0.5070 |
| <b>Hypertension</b>                             | 24,252 | 82.57% | 28,173 | 82.84% | 0.3720 |
| <b>Diabetes</b>                                 | 11,917 | 40.57% | 13,976 | 41.09% | 0.1830 |
| <b>Obesity</b>                                  | 7,591  | 25.84% | 7,862  | 23.12% | 0.0001 |
| <b>Atrial Fibrillation</b>                      | 4,624  | 15.74% | 5,331  | 15.67% | 0.8140 |
| <b>TIA</b>                                      | 82     | 0.28%  | 85     | 0.25%  | 0.4740 |
| <b>Coronary Artery Disease</b>                  | 24,863 | 84.65% | 28,856 | 84.85% | 0.4910 |
| <b>Dyslipidemia</b>                             | 21,630 | 73.64% | 24,799 | 72.92% | 0.0400 |
| <b>Smoking</b>                                  | 7,993  | 27.21% | 9,155  | 26.92% | 0.4050 |
| <b>Number of Beds</b>                           |        |        |        |        | 0.0030 |
| 0 – 299                                         | 10,211 | 34.76% | 11,394 | 33.50% |        |
| 300 – 500                                       | 9,605  | 32.70% | 11,239 | 33.05% |        |
| 500+                                            | 9,556  | 32.53% | 11,377 | 33.45% |        |
| <b>Region</b>                                   |        |        |        |        | 0.3160 |
| Midwest                                         | 7,786  | 26.51% | 8,875  | 26.10% |        |
| Northeast                                       | 3,834  | 13.05% | 4,400  | 12.94% |        |
| South                                           | 13,585 | 46.25% | 15,982 | 46.99% |        |
| West                                            | 4,167  | 14.19% | 4,753  | 13.98% |        |
| <b>Urban-Rural Status</b>                       |        |        |        |        | 0.0510 |
| Rural                                           | 3,865  | 13.16% | 4,656  | 13.69% |        |
| Urban                                           | 25,507 | 86.84% | 29,354 | 86.31% |        |
| <b>Teaching</b>                                 |        |        |        |        |        |
| <b>Percutaneous Coronary Intervention (PCI)</b> | 18,660 | 63.53% | 20,907 | 61.47% | 0.0001 |

**eTable 12. Mortality and length of stay for acute myocardial infarction (AMI) patients in the second wave of COVID-19 (June-August 2020) versus pre-COVID-19 study period (June-August 2019)**

|                                                                     | <b>Bivariate Comparison (COVID-19 versus pre-COVID-19)</b> | <b>Generalized estimating equation (GEE) Ratio of the Means<sup>a</sup></b> | <b>95% Confidence Interval (CI)</b> | <b>P-value<sup>c</sup></b> |
|---------------------------------------------------------------------|------------------------------------------------------------|-----------------------------------------------------------------------------|-------------------------------------|----------------------------|
| <b>Mortality (% of admissions)</b>                                  | 4.53% vs. 3.98%                                            | 1.17                                                                        | 1.09 – 1.27                         | <0.0001                    |
| <b>Adjusted LOS<sup>b</sup> (mean [standard error of the mean])</b> | 3.83 (0.05) vs. 3.93 (0.05)                                | 0.97                                                                        | 0.95 – 0.99                         | 0.0119                     |

<sup>a</sup>Generalized estimating equation model adjusted for study covariates; <sup>b</sup>LOS Length of stay; <sup>c</sup>P-value derived from GEE model

**eTable 13. Patient and provider characteristics for acute myocardial infarction (AMI) patients in the third wave of COVID-19 (September 2020 – February 2021) versus pre-COVID-19 study period (September 2019 – February 2020)**

|                               | COVID-19 Era<br>(September 2020 –<br>February 2021)<br>(N = 55,868) |        | Pre-COVID-19 Era<br>(September 2019 – February<br>2020)<br>(N = 68,130) |        | P-values          |
|-------------------------------|---------------------------------------------------------------------|--------|-------------------------------------------------------------------------|--------|-------------------|
|                               | N                                                                   | %      | N                                                                       | %      |                   |
| AMI Hospitalization<br>Volume | 55,868                                                              |        | 68,130                                                                  |        | 18.00%<br>decline |
| <b>Characteristics</b>        | N                                                                   | %      | N                                                                       | %      |                   |
| <b>Age (years)</b>            |                                                                     |        |                                                                         |        |                   |
| Median IQR                    | 67.00                                                               | 18.00  | 67.00                                                                   | 18.00  | 0.0007            |
| Mean +/- SD                   | 66.49                                                               | 13.03  | 66.74                                                                   | 13.07  | 0.4825            |
| 18 – 49                       | 5,921                                                               | 10.60% | 7,012                                                                   | 10.29% | 0.0130            |
| 50 – 59                       | 10,756                                                              | 19.25% | 12,993                                                                  | 19.07% |                   |
| 60 – 69                       | 15,451                                                              | 27.66% | 18,566                                                                  | 27.25% |                   |
| 70+                           | 23,740                                                              | 42.49% | 29,559                                                                  | 43.39% |                   |
| <b>Gender</b>                 |                                                                     |        |                                                                         |        | 0.0140            |
| Male                          | 35,567                                                              | 63.66% | 42,911                                                                  | 62.98% |                   |
| Female                        | 20,301                                                              | 36.34% | 25,219                                                                  | 37.02% |                   |
| <b>Race</b>                   |                                                                     |        |                                                                         |        | <0.0001           |
| White                         | 45,086                                                              | 80.70% | 54,323                                                                  | 79.73% |                   |
| Black                         | 6,062                                                               | 10.85% | 7,199                                                                   | 10.57% |                   |
| Asian                         | 1,182                                                               | 2.12%  | 1,418                                                                   | 2.08%  |                   |
| Other                         | 3,538                                                               | 6.33%  | 5,190                                                                   | 7.62%  |                   |
| <b>Marital Status</b>         |                                                                     |        |                                                                         |        | 0.5130            |
| Married                       | 26,402                                                              | 47.26% | 32,246                                                                  | 47.33% |                   |
| Single                        | 24,272                                                              | 43.45% | 29,437                                                                  | 43.21% |                   |
| Other                         | 5,194                                                               | 9.30%  | 6,447                                                                   | 9.46%  |                   |
| <b>Payor</b>                  |                                                                     |        |                                                                         |        | 0.0010            |
| Commercial                    | 13,239                                                              | 23.70% | 16,001                                                                  | 23.49% |                   |
| Medicaid                      | 5,484                                                               | 9.82%  | 6,301                                                                   | 9.25%  |                   |
| Medicare                      | 32,142                                                              | 57.53% | 39,834                                                                  | 58.47% |                   |
| Other                         | 5,003                                                               | 8.96%  | 5,994                                                                   | 8.80%  |                   |
| <b>Elixhauser Score</b>       |                                                                     |        |                                                                         |        | 0.1270            |

|                                                 |        |        |        |        |        |
|-------------------------------------------------|--------|--------|--------|--------|--------|
| 0                                               | 1,788  | 3.20%  | 2,189  | 3.21%  |        |
| 1                                               | 5,938  | 10.63% | 7,485  | 10.99% |        |
| 2+                                              | 48,142 | 86.17% | 58,456 | 85.80% |        |
| <b>Congestive Heart Failure</b>                 | 23,966 | 42.90% | 29,243 | 42.92% | 0.930  |
| <b>Hypertension</b>                             | 46,333 | 82.93% | 56,779 | 83.34% | 0.057  |
| <b>Diabetes</b>                                 | 22,754 | 40.73% | 28,419 | 41.71% | 0.000  |
| <b>Obesity</b>                                  | 14,312 | 25.62% | 16,038 | 23.54% | 0.000  |
| <b>Atrial Fibrillation</b>                      | 9,110  | 16.31% | 11,245 | 16.51% | 0.347  |
| <b>TIA</b>                                      | 120    | 0.21%  | 145    | 0.21%  | 0.941  |
| <b>Coronary Artery Disease</b>                  | 47,278 | 84.62% | 57,789 | 84.82% | 0.337  |
| <b>Dyslipidemia</b>                             | 41,467 | 74.22% | 49,878 | 73.21% | 0.000  |
| <b>Smoking</b>                                  | 14,826 | 26.54% | 17,977 | 26.39% | 0.548  |
| <b>Number of Beds</b>                           |        |        |        |        | 0.0140 |
| 0 – 299                                         | 19,470 | 34.85% | 23,206 | 34.06% |        |
| 300 – 500                                       | 18,060 | 32.33% | 22,267 | 32.68% |        |
| 500+                                            | 18,338 | 32.82% | 22,657 | 33.26% |        |
| <b>Region</b>                                   |        |        |        |        | 0.0070 |
| Midwest                                         | 14,292 | 25.58% | 16,873 | 24.77% |        |
| Northeast                                       | 7,259  | 12.99% | 9,020  | 13.24% |        |
| South                                           | 26,368 | 47.20% | 32,322 | 47.44% |        |
| West                                            | 7,949  | 14.23% | 9,915  | 14.55% |        |
| <b>Urban-Rural Status</b>                       |        |        |        |        | 0.0820 |
| Rural                                           | 7,279  | 13.03% | 8,650  | 12.70% |        |
| Urban                                           | 48,589 | 86.97% | 59,480 | 87.30% |        |
| <b>Teaching</b>                                 | 27,391 | 49.03% | 34,031 | 49.95% | 0.0010 |
| <b>Percutaneous Coronary Intervention (PCI)</b> | 34,883 | 62.44% | 41,458 | 60.85% | 0.0001 |

**eTable 14. Mortality and length of stay for acute myocardial infarction (AMI) patients in the third wave of COVID-19 (September 2020 – February 2021) versus pre-COVID-19 study period (September 2019 – February 2020)**

|                                                                     | <b>Bivariate Comparison (COVID-19 versus pre-COVID-19)</b> | <b>Generalized estimating equation (GEE) Ratio of the Means<sup>a</sup></b> | <b>95% Confidence Interval (CI)</b> | <b>P-value<sup>c</sup></b> |
|---------------------------------------------------------------------|------------------------------------------------------------|-----------------------------------------------------------------------------|-------------------------------------|----------------------------|
| <b>Mortality (% of admissions)</b>                                  | 5.08% vs. 4.39%                                            | 1.21                                                                        | 1.14 – 1.28                         | <0.0001                    |
| <b>Adjusted LOS<sup>b</sup> (mean [standard error of the mean])</b> | 3.86 (0.04) vs. 3.99 (0.04)                                | 0.97                                                                        | 0.95 – 0.98                         | <0.0001                    |

<sup>a</sup>Generalized estimating equation model adjusted for study covariates; <sup>b</sup>LOS Length of stay; <sup>c</sup>P-value derived from GEE model

**e Figure 1:** Flow diagram of hospitals contributing inpatient data continuously from March 2019 to December 2021

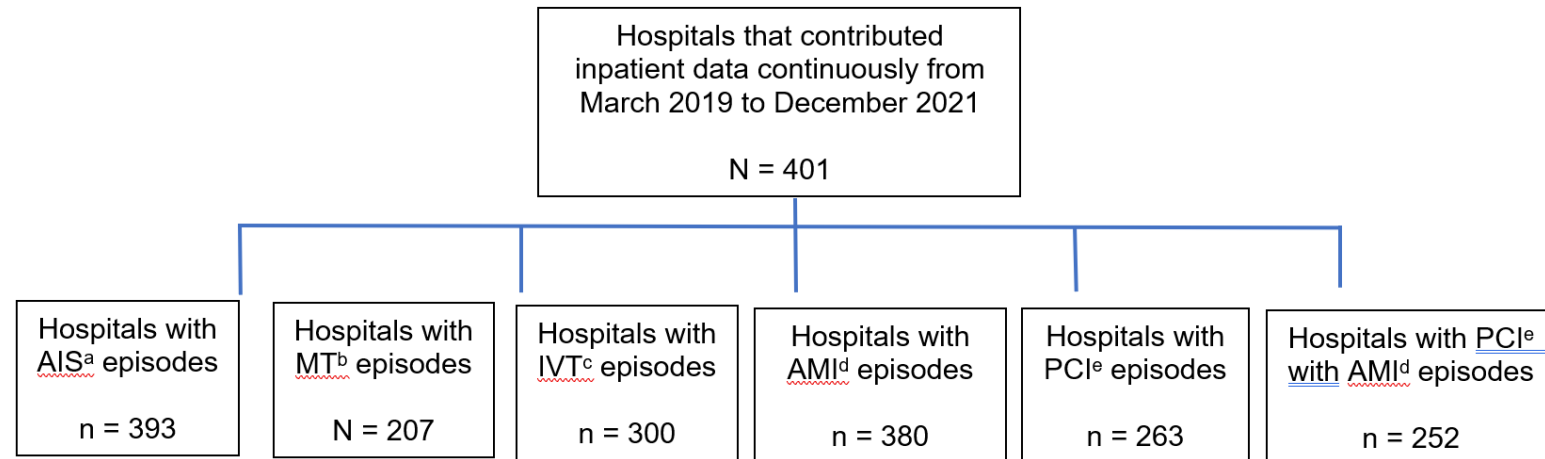

<sup>a</sup>AIS Acute Ischemic Stroke; <sup>b</sup>MT Mechanical Thrombectomy; <sup>c</sup>IVT Intravenous Thrombectomy; <sup>d</sup>AMI Acute Myocardial Infarction; <sup>e</sup>PCI Percutaneous Coronary Intervention

Note: AIS and AMI volume was based on inpatient admissions with a primary diagnosis of these two conditions, respectively; MT and IVT was based on inpatient admissions associated with primary or secondary diagnosis of AIS; PCI volume was based on inpatient admissions associated with these procedures irrespective of diagnosis; and PCI with AMI was based on inpatient admissions associated with AMI primary diagnosis. This allowed for better assessment of volume for these procedures, as some patients may have undergone these procedures and not received AIS or AMI primary diagnosis. As such, the average volume of PCI in the table is higher than the average volume of AMI, as PCI procedures may be associated with coronary artery disease treatment (besides AMI).

**Table 15. Characteristics of hospitals contributing inpatient data continuously from March 2019 to December 2021**

| Characteristics            | Hospitals with continuous inpatient data |        | Hospitals with AIS <sup>a</sup> episodes |        | Hospitals with MT <sup>b</sup> episodes |        | Hospitals with IVT <sup>c</sup> episodes |        | Hospitals with AMI <sup>d</sup> episodes |        | Hospitals with PCI <sup>e</sup> episodes |        | Hospitals with PCI <sup>e</sup> with AMI <sup>d</sup> episodes |        |
|----------------------------|------------------------------------------|--------|------------------------------------------|--------|-----------------------------------------|--------|------------------------------------------|--------|------------------------------------------|--------|------------------------------------------|--------|----------------------------------------------------------------|--------|
|                            | N                                        | %      | N                                        | %      | N                                       | %      | N                                        | %      | N                                        | %      | N                                        | %      | N                                                              | %      |
| <b>Number of hospitals</b> | 401                                      | 100%   | 393                                      | 100%   | 207                                     | 100%   | 300                                      | 100%   | 380                                      | 100%   | 263                                      | 100%   | 252                                                            | 100%   |
| <b>Number of beds</b>      |                                          |        |                                          |        |                                         |        |                                          |        |                                          |        |                                          |        |                                                                |        |
| 0-299                      | 269                                      | 67.08% | 261                                      | 66.41% | 85                                      | 41.06% | 168                                      | 56.00% | 248                                      | 65.26% | 133                                      | 50.57% | 123                                                            | 48.81% |
| 300-500                    | 77                                       | 19.20% | 77                                       | 19.59% | 68                                      | 32.85% | 77                                       | 25.67% | 77                                       | 20.26% | 75                                       | 28.52% | 74                                                             | 29.37% |
| 500+                       | 55                                       | 13.72% | 55                                       | 13.99% | 54                                      | 26.09% | 55                                       | 18.33% | 55                                       | 14.47% | 55                                       | 20.91% | 55                                                             | 21.83% |
| <b>Region</b>              |                                          |        |                                          |        |                                         |        |                                          |        |                                          |        |                                          |        |                                                                |        |
| Midwest                    | 85                                       | 21.20% | 83                                       | 21.12% | 35                                      | 16.91% | 54                                       | 18.00% | 83                                       | 21.84% | 49                                       | 18.63% | 49                                                             | 19.44% |
| Northeast                  | 57                                       | 14.21% | 56                                       | 14.25% | 36                                      | 17.39% | 50                                       | 16.67% | 56                                       | 14.74% | 33                                       | 12.55% | 30                                                             | 11.90% |
| South                      | 178                                      | 44.39% | 173                                      | 44.02% | 89                                      | 43.00% | 132                                      | 44.00% | 164                                      | 43.16% | 123                                      | 46.77% | 117                                                            | 46.43% |
| West                       | 81                                       | 20.20% | 81                                       | 20.61% | 47                                      | 22.71% | 64                                       | 21.33% | 77                                       | 20.26% | 58                                       | 22.05% | 56                                                             | 22.22% |
| <b>Urban-rural status</b>  |                                          |        |                                          |        |                                         |        |                                          |        |                                          |        |                                          |        |                                                                |        |
| Rural                      | 127                                      | 31.67% | 126                                      | 32.06% | 28                                      | 13.53% | 62                                       | 20.67% | 118                                      | 31.05% | 46                                       | 17.49% | 46                                                             | 18.25% |
| Urban                      | 274                                      | 68.33% | 267                                      | 67.94% | 179                                     | 86.47% | 238                                      | 79.33% | 262                                      | 68.95% | 217                                      | 82.51% | 206                                                            | 81.75% |
| <b>Teaching</b>            | 131                                      | 32.67% | 128                                      | 32.57% | 103                                     | 49.76% | 117                                      | 39.00% | 126                                      | 33.16% | 112                                      | 42.59% | 109                                                            | 43.25% |

<sup>a</sup>AIS Acute Ischemic Stroke; <sup>b</sup>MT Mechanical Thrombectomy; <sup>c</sup>IVT Intravenous Thrombectomy; <sup>d</sup>AMI Acute Myocardial Infarction; <sup>e</sup>PCI Percutaneous Coronary Intervention



**e Figure 2:** Volume of acute ischemic stroke (AIS), acute myocardial infarction (AMI), and number of US Deaths shown as number of admissions per month from March 2019 – December 2021

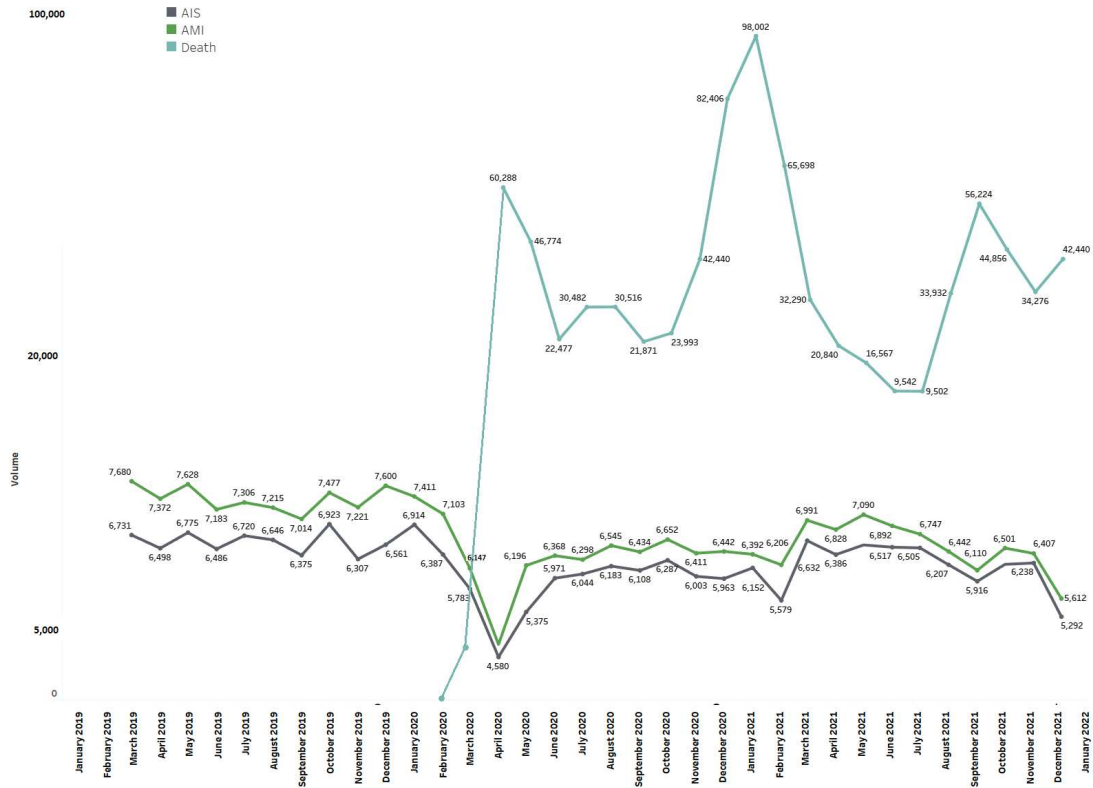

Deaths due to COVID-19 were referenced from: [https://covid.cdc.gov/covid-data-tracker/#trends\\_dailydeaths](https://covid.cdc.gov/covid-data-tracker/#trends_dailydeaths) (Accessed August 1, 2022)

**eFigure 3:** Volume of intravenous thrombolysis (IVT), mechanical thrombectomy (MT), percutaneous coronary intervention (PCI), and PCI with AMI shown as number of admissions per month from March 2019 – December 2021

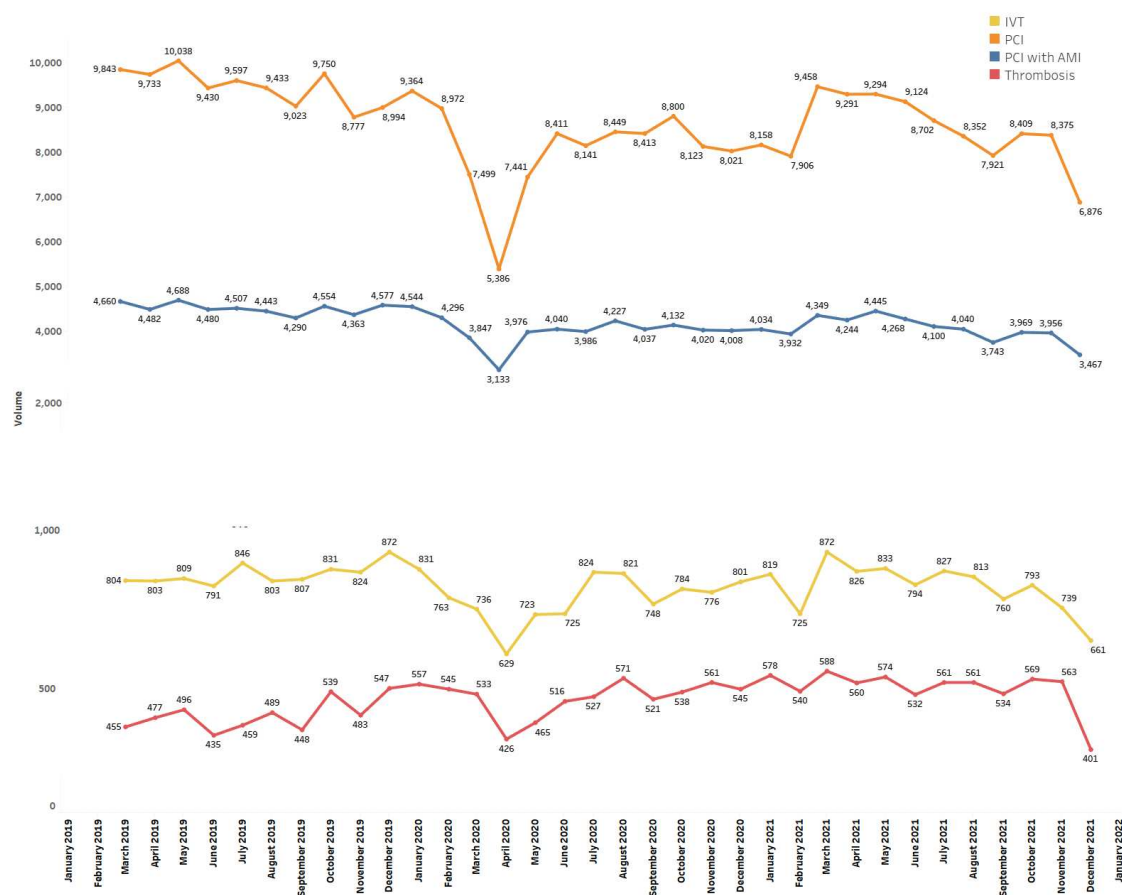

Note: AIS and AMI volume was based on inpatient admissions with a primary diagnosis of these two conditions, respectively; MT and IVT was based on inpatient admissions associated with primary or secondary diagnosis of AIS; PCI volume was based on inpatient admissions associated with these procedures irrespective of diagnosis; and PCI with AMI was based on inpatient admissions associated with AMI primary diagnosis. This allowed for better assessment of volume for these procedures, as some patients may have undergone these procedures and not received AIS or AMI primary diagnosis. As such, the average volume of PCI in the table is higher than the average volume of AMI, as PCI procedures may be associated with coronary artery disease treatment (besides AMI)
